# Supplementary material for: The impact of COVID-19 on healthcare booking and cancellation patterns: time series analysis of private healthcare service utilisation in Finland
Source: Springer Nature journal article supplement (doi:10.1186/s12913-024-10987-0), 2024-04-18
Supplement: MOESM1 [file 26994872]

## Supplementary material

### Supplementary material A

*Table A: Descriptive statistics for the data set. The number of individual persons and the number of individual appointments are reported for each service channel and time type, where applicable.*

*Model refers to the pre-2020 data used to train the baseline model, whereas Observation refers to the observed post-2020 data. Total contains the combined number of unique patients and appointments across the whole study period. For the Available bookings, only the number of appointments is reported, as these represent the total supply of possible appointments. For Bookings and Cancellations, the number of unique persons is also reported. Covid-19 testing began only after the onset of the pandemic, and no pre-pandemic model data exists.*

|                                      | Available    | Bookings       |              | Cancellations  |              |
|--------------------------------------|--------------|----------------|--------------|----------------|--------------|
|                                      | Appointments | Unique persons | Appointments | Unique persons | Appointments |
| Overall                              |              |                |              |                |              |
| Baseline model *                     | 6 783 229    | 675 326        | 4 872 557    | 147 083        | 269 449      |
| Observation **                       | 4 241 987    | 549 656        | 2 420 949    | 85 302         | 135 680      |
| Total                                | 11 025 216   | 900 572        | 7 293 506    | 203 950        | 405 129      |
| In-person,<br>Primary Care Physician |              |                |              |                |              |
| Baseline model *                     | 2 352 916    | 493 989        | 2 121 098    | 62 463         | 86 861       |
| Observation **                       | 843 381      | 283 654        | 684 659      | 26 225         | 32 315       |
| Total                                | 3 196 297    | 589 691        | 2 805 757    | 82 929         | 119 176      |
| In-person, Specialist                |              |                |              |                |              |
| Baseline model *                     | 2 181 430    | 449 372        | 1 751 716    | 83 171         | 134 725      |
| Observation **                       | 798 205      | 242 853        | 666 299      | 42 898         | 65 105       |
| Total                                | 2 979 635    | 537 077        | 2 418 015    | 114 364        | 199 830      |
| Digital appointments                 |              |                |              |                |              |
| Baseline model *                     | 104 157      | 35 914         | 43 310       | 176            | 186          |
| Observation **                       | 723 327      | 189 370        | 358 271      | 6 247          | 7 826        |
| Total                                | 827 484      | 211 855        | 401 581      | 6 414          | 8 012        |

|                                 |           |         |           |        |        |
|---------------------------------|-----------|---------|-----------|--------|--------|
| Laboratory                      |           |         |           |        |        |
| Baseline model *                | 1 363 505 | 281 541 | 663 393   | 30 645 | 38 069 |
| Observation **                  | 1 136 148 | 192 099 | 391 877   | 15 040 | 18 052 |
| Total                           | 2 499 653 | 370 021 | 1 055 270 | 43 910 | 56 121 |
| Laboratory,<br>COVID-19 testing |           |         |           |        |        |
| Baseline model *                | NA        | NA      | NA        | NA     | NA     |
| Observation **                  | 295 200   | 98 081  | 155 324   | 6 006  | 6 855  |
| Total                           | 295 200   | 98 081  | 155 324   | 6 006  | 6 855  |
| Imaging                         |           |         |           |        |        |
| Baseline model *                | 756 640   | 161 184 | 271 837   | 8 085  | 9 480  |
| Observation **                  | 430 230   | 100 154 | 150 387   | 4 664  | 5 460  |
| Total                           | 1 186 870 | 223 669 | 422 224   | 12 554 | 14 940 |
| Hospital services               |           |         |           |        |        |
| Baseline model *                | 24 581    | 16 006  | 21 203    | 104    | 128    |
| Observation **                  | 15 496    | 8 842   | 14 132    | 56     | 67     |
| Total                           | 40 077    | 23 956  | 35 335    | 160    | 195    |

\* 1.1.2017 - 31.12.2019

\*\* 1.1.2020 – 1.7.2021

## Supplementary material B

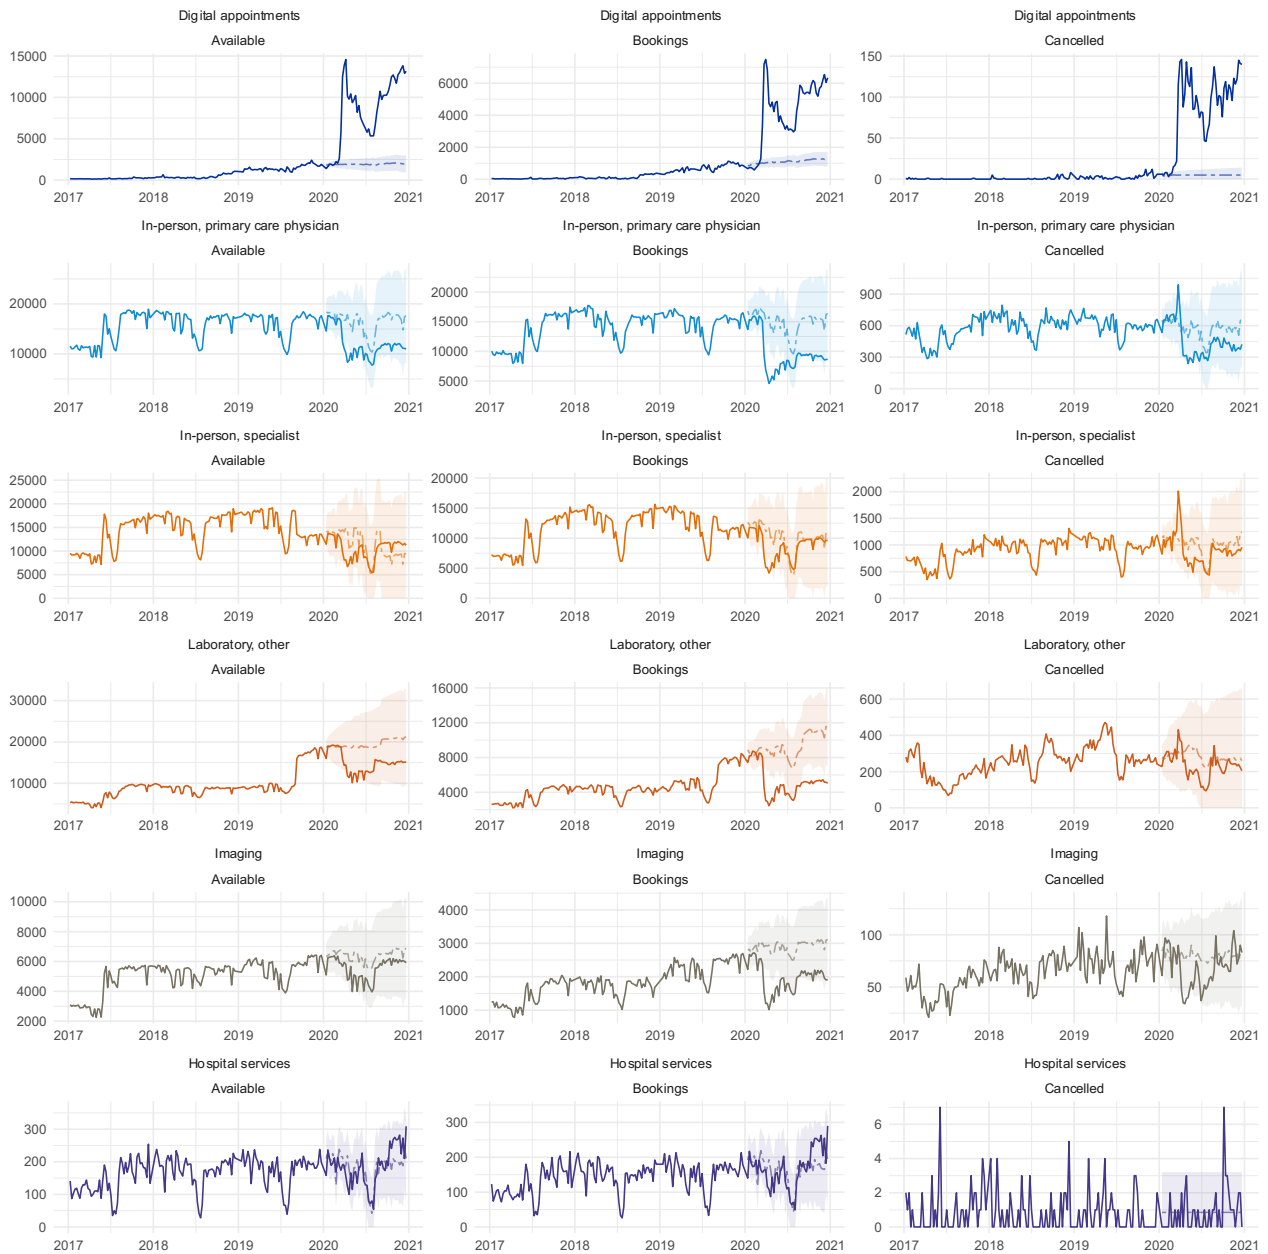

*Figure B: Time series for the individual service production channels across bookings, cancellations, and the numbers of available appointments. The solid line represents observed values, while the dotted line represents estimated activity without the effects of COVID-19. The ribbons, visible from*

*2020 onwards, refer to the 95% CI of the values. The estimate is built on the weekly values between 2017 and 2019.*

## Supplementary material C

*Table C: The difference between observed and estimated service usage within the different service production channels. The ratios represent total observed service usage divided by the expected, estimated service usage across five periods during the pandemic. The periods highlighted with a grey colour correspond to the states of emergencies in Finland. Positive values correspond to periods where the observed values were greater than the estimate, whereas negative values correspond to periods where the observed values were smaller than the estimate.*

| Period    |                                   | 2020-01-01<br>- | 2020-03-17<br>- | 2020-06-16<br>- | 2021-03-01<br>- | 2021-04-28<br>- | Overall  |
|-----------|-----------------------------------|-----------------|-----------------|-----------------|-----------------|-----------------|----------|
|           |                                   | 2020-03-16      | 2020-06-15      | 2021-02-28      | 2021-04-27      | 2021-06-28      |          |
| Available | Digital appointments              | 22,1 %          | 433,4 %         | 420,0 %         | 499,7 %         | 429,2 %         | 381,8 %  |
|           | In-person, primary care physician | -6,9 %          | -38,2 %         | -34,2 %         | -46,6 %         | -44,4 %         | -33,7 %  |
|           | In-person, specialist             | -6,6 %          | -33,2 %         | 11,6 %          | 11,2 %          | 17,3 %          | -0,8 %   |
|           | Laboratory                        | -0,3 %          | -32,9 %         | -28,0 %         | -31,1 %         | -32,0 %         | -26,2 %  |
|           | Imaging                           | -7,4 %          | -20,4 %         | -13,4 %         | -17,1 %         | -15,4 %         | -14,5 %  |
|           | Hospital services                 | -6,6 %          | -12,9 %         | 14,2 %          | 24,6 %          | 25,5 %          | 9,1 %    |
| Bookings  | Digital appointments              | 11,2 %          | 368,1 %         | 317,9 %         | 352,9 %         | 283,3 %         | 293,0 %  |
|           | In-person, primary care physician | -8,0 %          | -55,4 %         | -41,3 %         | -52,5 %         | -43,7 %         | -40,5 %  |
|           | In-person, specialist             | -9,3 %          | -40,4 %         | -5,2 %          | -11,8 %         | 4,2 %           | -12,4 %  |
|           | Laboratory                        | -5,2 %          | -57,4 %         | -52,7 %         | -57,8 %         | -58,0 %         | -49,5 %  |
|           | Imaging                           | -12,4 %         | -47,8 %         | -33,4 %         | -38,9 %         | -38,6 %         | -34,5 %  |
|           | Hospital services                 | -7,3 %          | -14,9 %         | 15,5 %          | 25,1 %          | 25,0 %          | 9,4 %    |
| Cancelled | Digital appointments              | 93,0 %          | 2179,5 %        | 2061,7 %        | 2828,7 %        | 2537,9 %        | 1965,8 % |
|           | In-person, primary care physician | 2,9 %           | -29,2 %         | -30,3 %         | -39,3 %         | -35,6 %         | -26,9 %  |
|           | In-person, specialist             | -3,8 %          | -13,6 %         | -16,7 %         | -30,6 %         | -31,8 %         | -18,0 %  |
|           | Laboratory                        | -2,4 %          | -22,2 %         | -21,1 %         | -4,4 %          | -17,2 %         | -16,3 %  |
|           | Imaging                           | 1,1 %           | -31,8 %         | -8,3 %          | -3,2 %          | -9,0 %          | -10,6 %  |
|           | Hospital services                 | -64,8 %         | -0,8 %          | 37,9 %          | -21,9 %         | -34,9 %         | 1,6 %    |
